# Supplementary material for: Genomic epidemiology and evolution of rhinovirus in western Washington State, 2021-22
Source: bioRxiv or medRxiv preprint supplement (doi:10.1101/2024.02.13.24302773), 2024-02-14

# Supplementary Figure 1. Rarefaction curves of the diversity of RV genotypes detected.

The rarefaction curve plots represent the number of genomes sampled against the genotypic richness detected. The coverage-based rarefaction (solid lines) and extrapolation (dashed lines) curve plots are based on species richness (Hill's numbers  $q=0$ ) and include the 95% confidence intervals as shaded areas based on 200 replication bootstrap method. For both analysis, rarefaction and coverage-based extrapolation, all RV species per year of sample collection and each RV species per month of sample collection were analyzed.

## Rarefaction curves

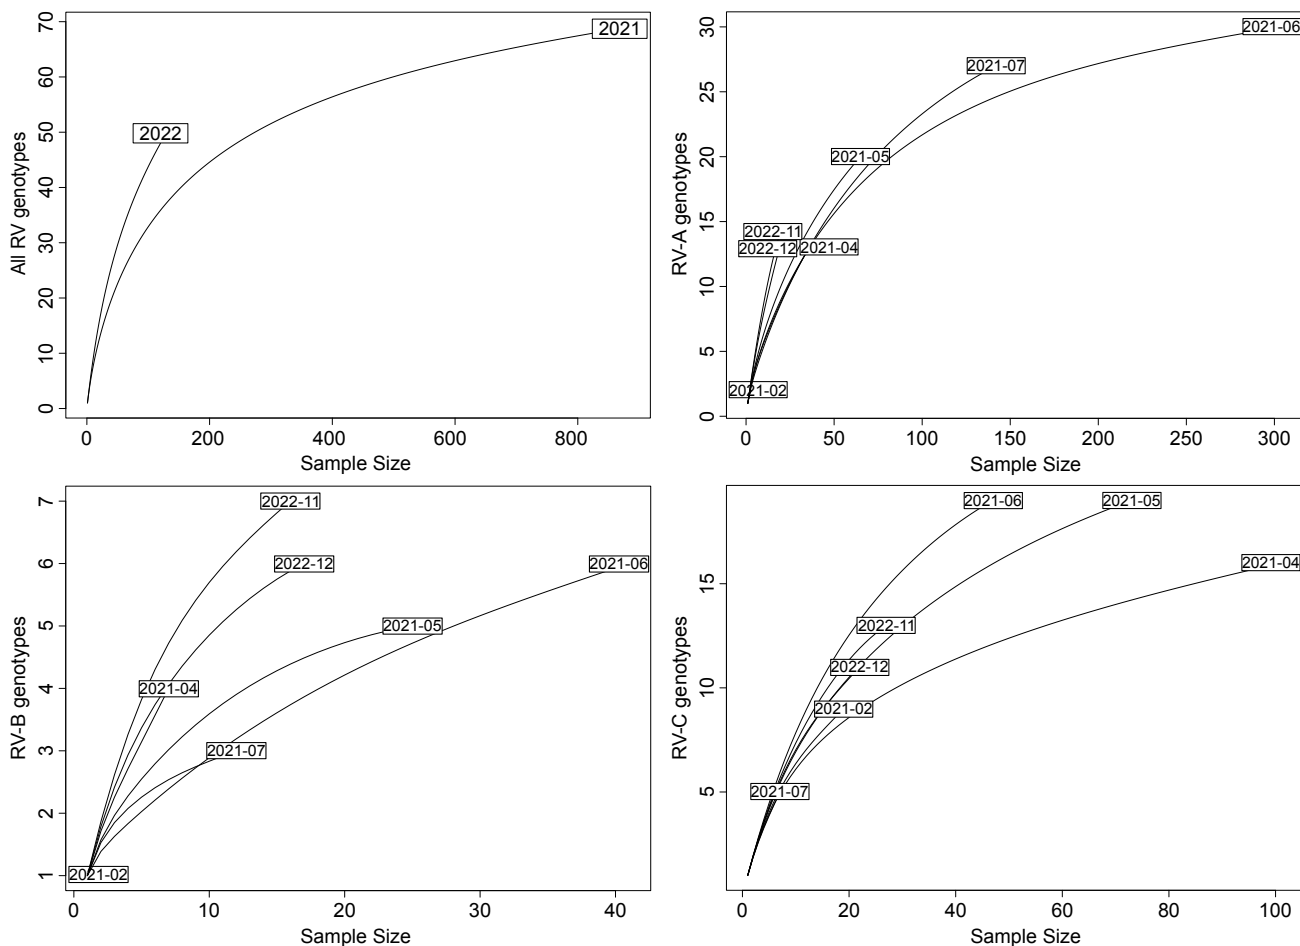

## Coverage-based rarefaction/extrapolation curve

— Rarefaction  
- - Extrapolation

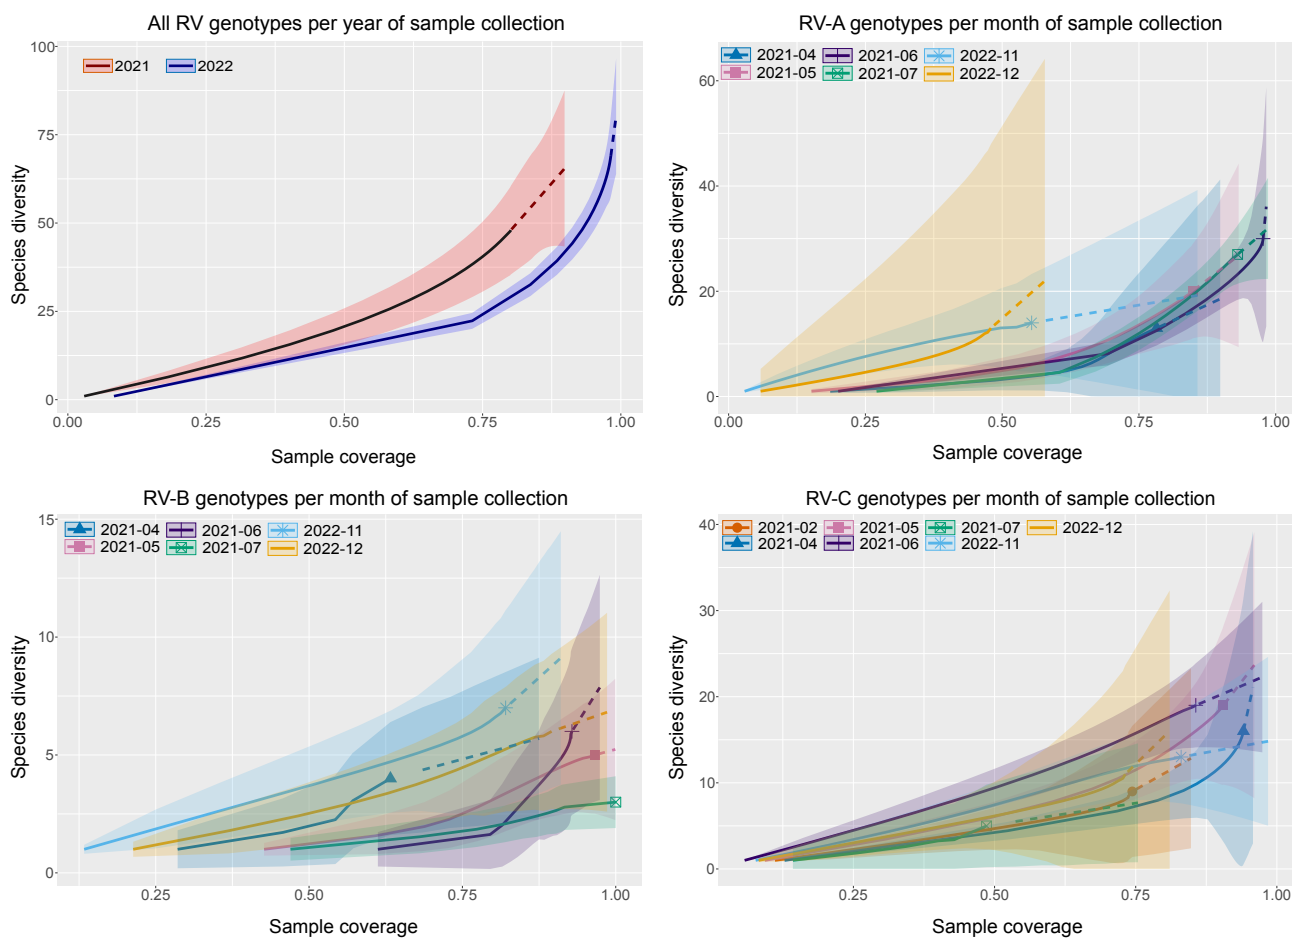

Supplement: Supplementary file [file media-2.pdf]
