# Supplementary material for: Genomic epidemiology and evolution of rhinovirus in western Washington State, 2021-22
Source: bioRxiv or medRxiv preprint supplement (doi:10.1101/2024.02.13.24302773), 2024-02-14

## Supplementary Figure 2. Detection of the new genotypes A111 and C59.

Characterization of the new genotypes A111 (A) and C59 (B). Partial phylogenetic trees show the monophyletic clade statistically supported by ultrafast bootstrap (with value above 90) indicated with a red square and the closest genotype/s highlighted in gray. Scale bar indicates substitution per site. At the right of each subtree, the evolutionary divergence (calculated as average p-distance) between and within genotype clades is informed in bold and the standard error estimation in blue italics.

### A

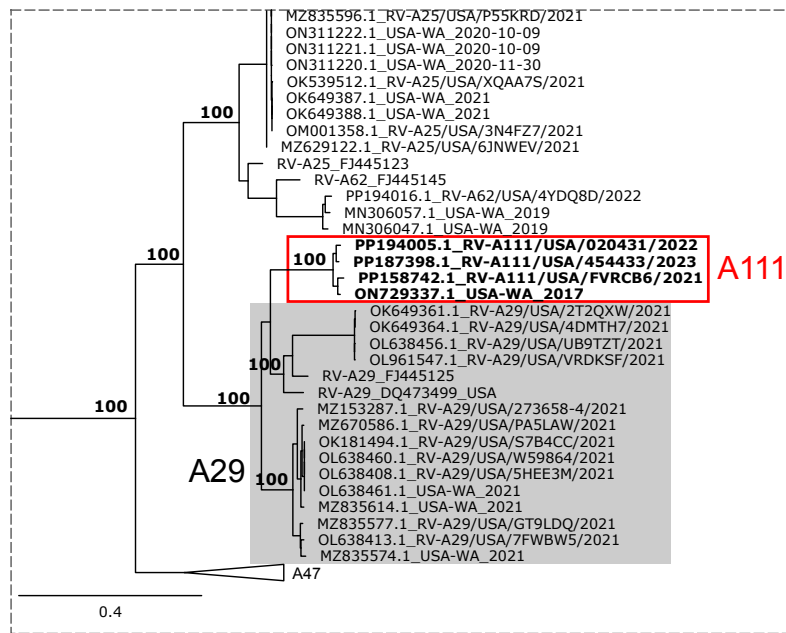

### B

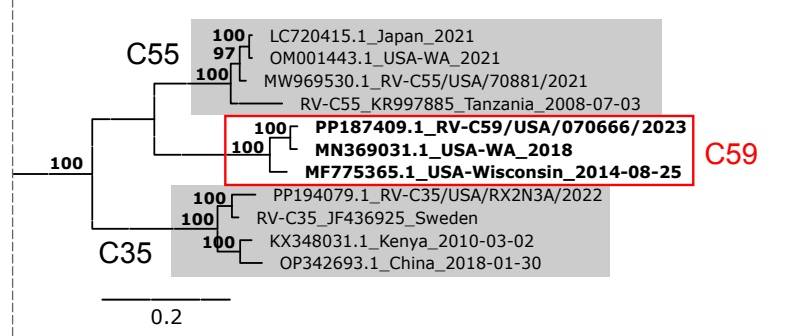

Supplement: Supplementary file [file media-3.pdf]
